# Supplementary material for: Insights into Metabolic Reactions of Semi-Dwarf, Barley Brassinosteroid Mutants to Drought
Source: PubMed Central journal article supplement (PMC7404083; doi:10.3390/ijms21145096), 2020-07-19
Supplement: ijms-21-05096-s001.pdf [file ijms-21-05096-s001.pdf]

## Supplementary materials

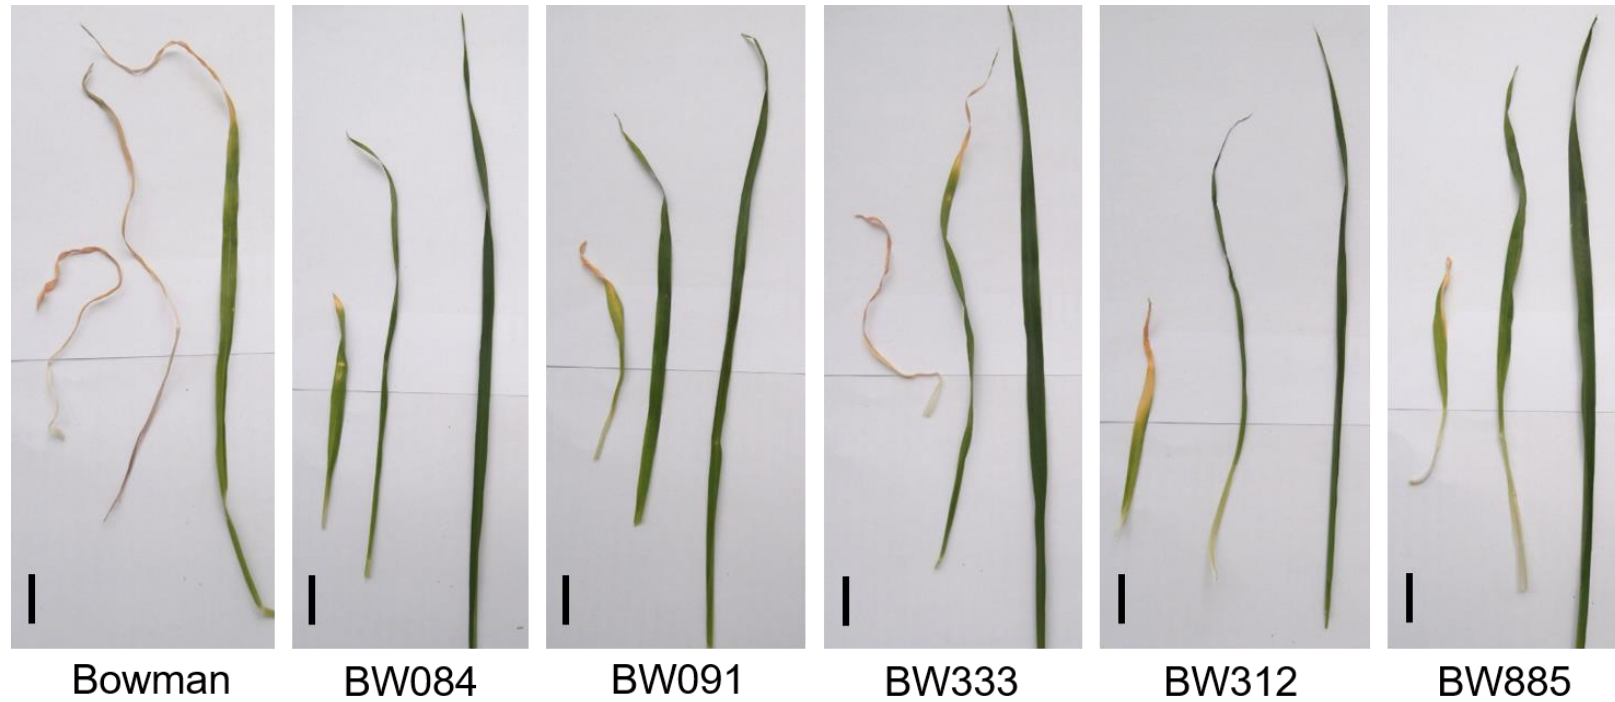

**Figure 1S .** Leaf injuries in the ‘Bowman’ and BR-deficient or BR-insensitive mutant plants after 3 weeks of drought. In each picture from left to right: the first (the oldest), the second, and the third leaf of each genotype. Bar: 1 cm.

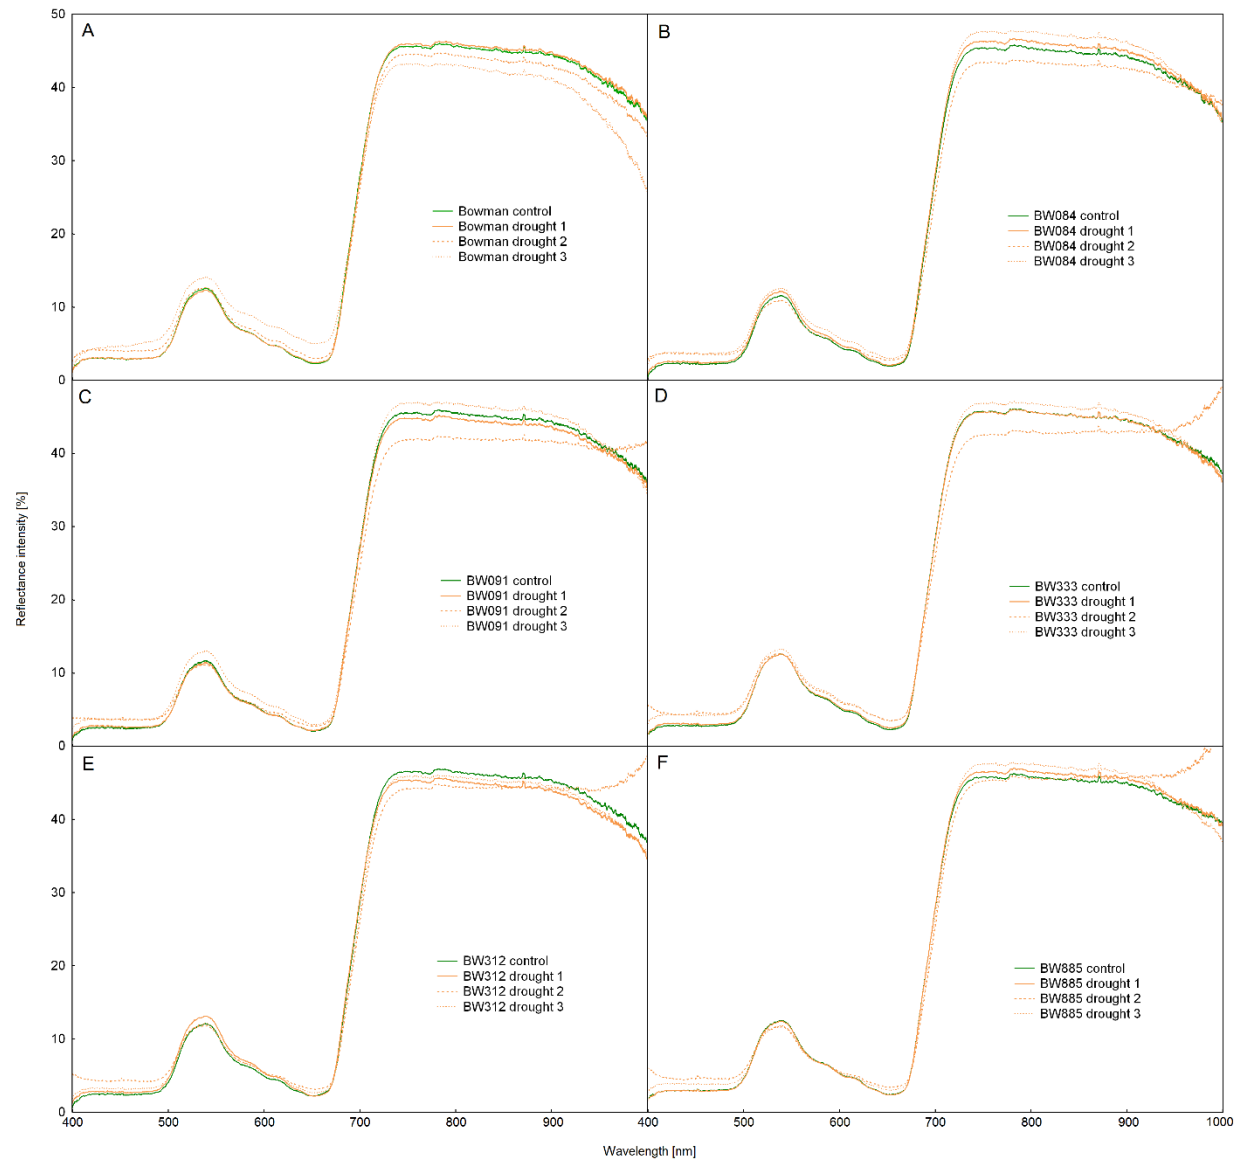

**Figure 2S.** The reflectance signatures of the analyzed genotypes under the control conditions and during the 3-week drought period.

**Table 1S.** Sequences of primers and probes used in the analysis of the *HvAPX*, *HvCat2*, and *HvSOD1* transcript accumulation. The *HvADP* gene was applied as the endogenous control.

| <b>Gene name</b> | <b>GenBank ID</b> | <b>Forward primer</b>     | <b>Reverse primer</b>   | <b>TaqMan MGB Probe</b>     |
|------------------|-------------------|---------------------------|-------------------------|-----------------------------|
| <i>Cat2</i>      | U20778.1          | CTTCAAGCCCAACCCAAAGTC     | TGGTGGGAGAGGAAGTCGAA    | FAM- ACGCGCCAGTACTC-MGB     |
| <i>SOD1</i>      | HM537232.1        | GGTGACACGACTAATGGATGCATAT | CATGTGTCAGGCCGTTTGG     | FAM- ACAGGGCCACATTTTA-MGB   |
| <i>APX</i>       | AJ006358.1        | CGCCGATCTCTACCAGCTT       | TCCCTCCCTGGGTGGAA       | FAM- CTCCACGGCGACAACACT-MGB |
| <i>ADP</i>       | AJ508228.2        | GTGGAGGCACTACTTCCAGAAT    | ACAACACGTTCCCTATCATTGCT | FAM- ACGCAGGGCCTCATTT-MGB   |
